# Supplementary material
Source: ML conference proceedings conference paper supplement (https://openreview.net/forum?id=W0fmImkpHp)
Supplement: supplementary_material [file attachment]

[https://anonymous.4open.science/r/ICLR24\\_PID3804-F734/README.md](https://anonymous.4open.science/r/ICLR24_PID3804-F734/README.md)
